# Supplementary material for: Characterization of Information-Based Learning Benefits with Submovement Dynamics and Muscular Rhythmicity
Source: PLoS One. 2013 Dec 18;8(12):e82920. doi: 10.1371/journal.pone.0082920 (PMC3867443; doi:10.1371/journal.pone.0082920)
Supplement: Appendix S1 — (DOC) [file pone.0082920.s001.doc]

**Appendix S1**

The calculation of the multi-scale entropy area (MSE Area) consists of three steps [28,29].

The first step: Obtain the coarse-grained sequences of a down-sampled

submovement trace {*X(τ* )}

(a)

where {z1, z2, . . ., zN} is the time series of submovement and τ is the time scale

The second step: Calculation of SampEn for each coarse-grained sequence {*X(τ* )}

MSE(τ ) = {*SampEn*(*m, r, N*)(τ ),τ=1,2,…25} (b)

(c)

(d)

(e)

SampEn measures the negative natural logarithm of an estimate of the conditional probability that epochs of length *m* that match point-wise within a tolerance level (*r*) also match at the next point. In equation (d), *d*[] denotes Euclidean distance. Here, *r* = 20% of the standard deviations of *X(τ* ), and *m* = 2. [28,29]

The third step: Summation of each MSE(τ ) across different time scales (τ) to

obtain MSE area

(f)
